# Supplementary material for: A 2-Gene Host Signature for Improved Accuracy of COVID-19 Diagnosis Agnostic to Viral Variants
Source: Research Square preprint supplement (doi:10.21203/rs.3.rs-1209107/v1), 2022-01-13
Supplement: Supplementary file 1 [file 64e099e13a8376fb7054aa13.xlsx]

## Sheet: UCSF_samples_metadata
czb_id	seq_batch	imputed_gender	age	viral_status	sc2_rpm	rhinovirus	influenza	metapneumovirus	orthopneumovirus	rubulavirus	other_coronavirus
RR057e_00039	SEQ003	M	42	no_virus	0.0757866	FALSE	FALSE	FALSE	FALSE	FALSE	FALSE
RR057e_00042	SEQ005	F	38	no_virus	0.781755	FALSE	FALSE	FALSE	FALSE	FALSE	FALSE
RR057e_00049	SEQ003	M	60	no_virus	0	FALSE	FALSE	FALSE	FALSE	FALSE	FALSE
RR057e_00051	SEQ005	M	75	no_virus	0.607332	FALSE	FALSE	FALSE	FALSE	FALSE	FALSE
RR057e_00052	SEQ005	F	64	no_virus	0.301848	FALSE	FALSE	FALSE	FALSE	FALSE	FALSE
RR057e_00058	SEQ003	M	66	no_virus	0.135846	FALSE	FALSE	FALSE	FALSE	FALSE	FALSE
RR057e_00066	SEQ005	F	82	no_virus	0.372662	FALSE	FALSE	FALSE	FALSE	FALSE	FALSE
RR057e_00073	SEQ003	F	33	no_virus	0.0397825	FALSE	FALSE	FALSE	FALSE	FALSE	FALSE
RR057e_00074	SEQ003	M	57	no_virus	0.0290325	FALSE	FALSE	FALSE	FALSE	FALSE	FALSE
RR057e_00076	SEQ003	F	34	no_virus	0.0261552	FALSE	FALSE	FALSE	FALSE	FALSE	FALSE
RR057e_00079	SEQ003	F	54	no_virus	0	FALSE	FALSE	FALSE	FALSE	FALSE	FALSE
RR057e_00080	SEQ003	M	81	no_virus	0.0911987	FALSE	FALSE	FALSE	FALSE	FALSE	FALSE
RR057e_00084	SEQ005	F	38	no_virus	1.08374	FALSE	FALSE	FALSE	FALSE	FALSE	FALSE
RR057e_00086	SEQ003	M	42	no_virus	0.0436522	FALSE	FALSE	FALSE	FALSE	FALSE	FALSE
RR057e_00088	SEQ003	F	66	no_virus	0.212989	FALSE	FALSE	FALSE	FALSE	FALSE	FALSE
RR057e_00093	SEQ003	F	72	no_virus	0.0702916	FALSE	FALSE	FALSE	FALSE	FALSE	FALSE
RR057e_00102	SEQ003	F	29	no_virus	0.116121	FALSE	FALSE	FALSE	FALSE	FALSE	FALSE
RR057e_00105	SEQ003	F	66	no_virus	0.0510571	FALSE	FALSE	FALSE	FALSE	FALSE	FALSE
RR057e_00116	SEQ003	M	70	no_virus	0.0844766	FALSE	FALSE	FALSE	FALSE	FALSE	FALSE
RR057e_00117	SEQ005	F	38	no_virus	0.454364	FALSE	FALSE	FALSE	FALSE	FALSE	FALSE
RR057e_00119	SEQ005	F	73	no_virus	0.357314	FALSE	FALSE	FALSE	FALSE	FALSE	FALSE
RR057e_00130	SEQ003	M	88	no_virus	0.134353	FALSE	FALSE	FALSE	FALSE	FALSE	FALSE
RR057e_00131	SEQ003	F	76	no_virus	0	FALSE	FALSE	FALSE	FALSE	FALSE	FALSE
RR057e_00138	SEQ005	M	74	no_virus	0.409621	FALSE	FALSE	FALSE	FALSE	FALSE	FALSE
RR057e_00140	SEQ003	F	44	no_virus	0.0732079	FALSE	FALSE	FALSE	FALSE	FALSE	FALSE
RR057e_00142	SEQ003	M	64	no_virus	0.098347	FALSE	FALSE	FALSE	FALSE	FALSE	FALSE
RR057e_00143	SEQ003	M	36	no_virus	0.0242211	FALSE	FALSE	FALSE	FALSE	FALSE	FALSE
RR057e_00145	SEQ005	F	72	no_virus	0.592787	FALSE	FALSE	FALSE	FALSE	FALSE	FALSE
RR057e_00165	SEQ005	M	56	no_virus	0.352707	FALSE	FALSE	FALSE	FALSE	FALSE	FALSE
RR057e_00168	SEQ003	M	65	no_virus	0.0619782	FALSE	FALSE	FALSE	FALSE	FALSE	FALSE
RR057e_00169	SEQ005	F	53	no_virus	0.265769	FALSE	FALSE	FALSE	FALSE	FALSE	FALSE
RR057e_00171	SEQ003	F	82	no_virus	0.189795	FALSE	FALSE	FALSE	FALSE	FALSE	FALSE
RR057e_00173	SEQ003	M	71	no_virus	0.0623225	FALSE	FALSE	FALSE	FALSE	FALSE	FALSE
RR057e_00187	SEQ005	F	47	no_virus	0.276276	FALSE	FALSE	FALSE	FALSE	FALSE	FALSE
RR057e_00198	SEQ003	M	48	no_virus	0.0820277	FALSE	FALSE	FALSE	FALSE	FALSE	FALSE
RR057e_00202	SEQ005	F	62	no_virus	0.301622	FALSE	FALSE	FALSE	FALSE	FALSE	FALSE
RR057e_00203	SEQ003	M	39	no_virus	0	FALSE	FALSE	FALSE	FALSE	FALSE	FALSE
RR057e_00206	SEQ003	M	74	no_virus	0.234258	FALSE	FALSE	FALSE	FALSE	FALSE	FALSE
RR057e_00216	SEQ003	F	64	no_virus	0.10396	FALSE	FALSE	FALSE	FALSE	FALSE	FALSE
RR057e_00222	SEQ003	F	72	no_virus	0	FALSE	FALSE	FALSE	FALSE	FALSE	FALSE
RR057e_00231	SEQ003	F	44	no_virus	0.245845	FALSE	FALSE	FALSE	FALSE	FALSE	FALSE
RR057e_00239	SEQ005	M	63	no_virus	0.266228	FALSE	FALSE	FALSE	FALSE	FALSE	FALSE
RR057e_00246	SEQ005	M	63	no_virus	0.172011	FALSE	FALSE	FALSE	FALSE	FALSE	FALSE
RR057e_00254	SEQ005	M	45	no_virus	0.535249	FALSE	FALSE	FALSE	FALSE	FALSE	FALSE
RR057e_00259	SEQ003	M	44	no_virus	0.0398713	FALSE	FALSE	FALSE	FALSE	FALSE	FALSE
RR057e_00260	SEQ003	F	73	no_virus	68.4835	FALSE	FALSE	FALSE	FALSE	FALSE	FALSE
RR057e_00261	SEQ003	M	51	no_virus	0.105974	FALSE	FALSE	FALSE	FALSE	FALSE	FALSE
RR057e_00268	SEQ003	F	52	no_virus	0.0637215	FALSE	FALSE	FALSE	FALSE	FALSE	FALSE
RR057e_00272	SEQ003	M	67	no_virus	0.388085	FALSE	FALSE	FALSE	FALSE	FALSE	FALSE
RR057e_00273	SEQ003	F	85	no_virus	0.172887	FALSE	FALSE	FALSE	FALSE	FALSE	FALSE
RR057e_00280	SEQ005	F	64	no_virus	0.382426	FALSE	FALSE	FALSE	FALSE	FALSE	FALSE
RR057e_00285	SEQ005	F	83	no_virus	0.300967	FALSE	FALSE	FALSE	FALSE	FALSE	FALSE
RR057e_00287	SEQ005	F	76	no_virus	0.76369	FALSE	FALSE	FALSE	FALSE	FALSE	FALSE
RR057e_00290	SEQ005	F	44	no_virus	0.219158	FALSE	FALSE	FALSE	FALSE	FALSE	FALSE
RR057e_00291	SEQ005	M	42	no_virus	0.189778	FALSE	FALSE	FALSE	FALSE	FALSE	FALSE
RR057e_00294	SEQ005	F	59	no_virus	0.535499	FALSE	FALSE	FALSE	FALSE	FALSE	FALSE
RR057e_00295	SEQ005	F	57	no_virus	0.556922	FALSE	FALSE	FALSE	FALSE	FALSE	FALSE
RR057e_00302	SEQ003	M	71	no_virus	0.240177	FALSE	FALSE	FALSE	FALSE	FALSE	FALSE
RR057e_00309	SEQ005	M	77	no_virus	0.268267	FALSE	FALSE	FALSE	FALSE	FALSE	FALSE
RR057e_00318	SEQ005	F	35	no_virus	0.228243	FALSE	FALSE	FALSE	FALSE	FALSE	FALSE
RR057e_00324	SEQ005	F	24	no_virus	0.94871	FALSE	FALSE	FALSE	FALSE	FALSE	FALSE
RR057e_00340	SEQ005	F	46	no_virus	0.495788	FALSE	FALSE	FALSE	FALSE	FALSE	FALSE
RR057e_00399	SEQ003	M	73	no_virus	0.102108	FALSE	FALSE	FALSE	FALSE	FALSE	FALSE
RR057e_00401	SEQ003	F	77	no_virus	0.245909	FALSE	FALSE	FALSE	FALSE	FALSE	FALSE
RR057e_00410	SEQ005	F	65	no_virus	0.092897	FALSE	FALSE	FALSE	FALSE	FALSE	FALSE
RR057e_00412	SEQ003	M	72	no_virus	0.136573	FALSE	FALSE	FALSE	FALSE	FALSE	FALSE
RR057e_00414	SEQ003	M	45	no_virus	0.355405	FALSE	FALSE	FALSE	FALSE	FALSE	FALSE
RR057e_00416	SEQ003	F	37	no_virus	0.168437	FALSE	FALSE	FALSE	FALSE	FALSE	FALSE
RR057e_00440	SEQ005	F	82	no_virus	1.03719	FALSE	FALSE	FALSE	FALSE	FALSE	FALSE
RR057e_00442	SEQ003	F	70	no_virus	0.0967755	FALSE	FALSE	FALSE	FALSE	FALSE	FALSE
RR057e_00449	SEQ005	F	65	no_virus	0.525553	FALSE	FALSE	FALSE	FALSE	FALSE	FALSE
RR057e_00451	SEQ003	M	78	no_virus	0	FALSE	FALSE	FALSE	FALSE	FALSE	FALSE
RR057e_00456	SEQ003	M	67	no_virus	0.172255	FALSE	FALSE	FALSE	FALSE	FALSE	FALSE
RR057e_00460	SEQ005	F	44	no_virus	0.585508	FALSE	FALSE	FALSE	FALSE	FALSE	FALSE
RR057e_00475	SEQ005	M	52	no_virus	0.48583	FALSE	FALSE	FALSE	FALSE	FALSE	FALSE
RR057e_00485	SEQ005	F	62	no_virus	0.219233	FALSE	FALSE	FALSE	FALSE	FALSE	FALSE
RR057e_00494	SEQ005	M	64	no_virus	0.433685	FALSE	FALSE	FALSE	FALSE	FALSE	FALSE
RR057e_00508	SEQ005	M	49	no_virus	0.0916883	FALSE	FALSE	FALSE	FALSE	FALSE	FALSE
RR057e_00515	SEQ005	F	41	no_virus	0.678452	FALSE	FALSE	FALSE	FALSE	FALSE	FALSE
RR057e_00549	SEQ005	F	60	no_virus	0.788362	FALSE	FALSE	FALSE	FALSE	FALSE	FALSE
RR057e_00560	SEQ005	M	89	no_virus	0.794893	FALSE	FALSE	FALSE	FALSE	FALSE	FALSE
RR057e_00567	SEQ005	F	59	no_virus	1.15987	FALSE	FALSE	FALSE	FALSE	FALSE	FALSE
RR057e_00590	SEQ005	F	41	no_virus	0.513848	FALSE	FALSE	FALSE	FALSE	FALSE	FALSE
RR057e_00762	SEQ003	M	33	no_virus	0	FALSE	FALSE	FALSE	FALSE	FALSE	FALSE
RR057e_00763	SEQ003	M	41	no_virus	0	FALSE	FALSE	FALSE	FALSE	FALSE	FALSE
RR057e_00765	SEQ003	M	54	no_virus	0.377629	FALSE	FALSE	FALSE	FALSE	FALSE	FALSE
RR057e_00788	SEQ007	F	28	no_virus	0.245166	FALSE	FALSE	FALSE	FALSE	FALSE	FALSE
RR057e_00798	SEQ014	M	30	no_virus	0.250371	FALSE	FALSE	FALSE	FALSE	FALSE	FALSE
RR057e_00805	SEQ014	F	56	no_virus	0	FALSE	FALSE	FALSE	FALSE	FALSE	FALSE
RR057e_00806	SEQ014	F	55	no_virus	0.041385	FALSE	FALSE	FALSE	FALSE	FALSE	FALSE
RR057e_00808	SEQ014	M	79	no_virus	0.213602	FALSE	FALSE	FALSE	FALSE	FALSE	FALSE
RR057e_00812	SEQ014	F	38	no_virus	1.14958	FALSE	FALSE	FALSE	FALSE	FALSE	FALSE
RR057e_00814	SEQ014	F	84	no_virus	0.269977	FALSE	FALSE	FALSE	FALSE	FALSE	FALSE
RR057e_00816	SEQ014	M	61	no_virus	0.0316441	FALSE	FALSE	FALSE	FALSE	FALSE	FALSE
RR057e_00818	SEQ014	F	66	no_virus	0.347654	FALSE	FALSE	FALSE	FALSE	FALSE	FALSE
RR057e_00821	SEQ014	F	66	no_virus	1.68594	FALSE	FALSE	FALSE	FALSE	FALSE	FALSE
RR057e_00822	SEQ014	F	52	no_virus	0.156651	FALSE	FALSE	FALSE	FALSE	FALSE	FALSE
RR057e_00823	SEQ014	F	61	no_virus	1.68757	FALSE	FALSE	FALSE	FALSE	FALSE	FALSE
RR057e_00825	SEQ014	F	67	no_virus	1.80326	FALSE	FALSE	FALSE	FALSE	FALSE	FALSE
RR057e_00826	SEQ014	F	59	no_virus	1.53864	FALSE	FALSE	FALSE	FALSE	FALSE	FALSE
RR057e_00827	SEQ014	F	65	no_virus	0.561429	FALSE	FALSE	FALSE	FALSE	FALSE	FALSE
RR057e_00828	SEQ014	M	28	no_virus	1.24798	FALSE	FALSE	FALSE	FALSE	FALSE	FALSE
RR057e_00829	SEQ014	F	66	no_virus	0.558309	FALSE	FALSE	FALSE	FALSE	FALSE	FALSE
RR057e_00830	SEQ014	F	50	no_virus	1.70132	FALSE	FALSE	FALSE	FALSE	FALSE	FALSE
RR057e_00831	SEQ014	F	67	no_virus	0.761543	FALSE	FALSE	FALSE	FALSE	FALSE	FALSE
RR057e_00832	SEQ014	M	78	no_virus	1.75034	FALSE	FALSE	FALSE	FALSE	FALSE	FALSE
RR057e_00833	SEQ014	M	64	no_virus	0.690587	FALSE	FALSE	FALSE	FALSE	FALSE	FALSE
RR057e_00834	SEQ014	F	95	no_virus	0.0389958	FALSE	FALSE	FALSE	FALSE	FALSE	FALSE
RR057e_00835	SEQ014	F	70	no_virus	1.0992	FALSE	FALSE	FALSE	FALSE	FALSE	FALSE
RR057e_00836	SEQ014	F	94	no_virus	1.23041	FALSE	FALSE	FALSE	FALSE	FALSE	FALSE
RR057e_00837	SEQ014	M	67	no_virus	1.91067	FALSE	FALSE	FALSE	FALSE	FALSE	FALSE
RR057e_00838	SEQ014	F	49	no_virus	0.0437816	FALSE	FALSE	FALSE	FALSE	FALSE	FALSE
RR057e_00840	SEQ014	F	60	no_virus	0.0917016	FALSE	FALSE	FALSE	FALSE	FALSE	FALSE
RR057e_00841	SEQ014	M	62	no_virus	2.25164	FALSE	FALSE	FALSE	FALSE	FALSE	FALSE
RR057e_00842	SEQ014	F	24	no_virus	0.255116	FALSE	FALSE	FALSE	FALSE	FALSE	FALSE
RR057e_00843	SEQ014	M	32	no_virus	2.33551	FALSE	FALSE	FALSE	FALSE	FALSE	FALSE
RR057e_00844	SEQ014	F	58	no_virus	0.621194	FALSE	FALSE	FALSE	FALSE	FALSE	FALSE
RR057e_00845	SEQ014	M	60	no_virus	0.354852	FALSE	FALSE	FALSE	FALSE	FALSE	FALSE
RR057e_00846	SEQ014	F	62	no_virus	1.74753	FALSE	FALSE	FALSE	FALSE	FALSE	FALSE
RR057e_00847	SEQ014	F	67	no_virus	0.934848	FALSE	FALSE	FALSE	FALSE	FALSE	FALSE
RR057e_00848	SEQ014	F	22	no_virus	0.372391	FALSE	FALSE	FALSE	FALSE	FALSE	FALSE
RR057e_00849	SEQ014	F	50	no_virus	1.82155	FALSE	FALSE	FALSE	FALSE	FALSE	FALSE
RR057e_00851	SEQ014	F	64	no_virus	1.59724	FALSE	FALSE	FALSE	FALSE	FALSE	FALSE
RR057e_00852	SEQ014	F	47	no_virus	0.201259	FALSE	FALSE	FALSE	FALSE	FALSE	FALSE
RR057e_00853	SEQ014	F	51	no_virus	2.49725	FALSE	FALSE	FALSE	FALSE	FALSE	FALSE
RR057e_00854	SEQ014	M	52	no_virus	1.05923	FALSE	FALSE	FALSE	FALSE	FALSE	FALSE
RR057e_00855	SEQ014	F	41	no_virus	1.96102	FALSE	FALSE	FALSE	FALSE	FALSE	FALSE
RR057e_00856	SEQ014	F	50	no_virus	1.48694	FALSE	FALSE	FALSE	FALSE	FALSE	FALSE
RR057e_00857	SEQ014	M	58	no_virus	1.41065	FALSE	FALSE	FALSE	FALSE	FALSE	FALSE
RR057e_00858	SEQ014	M	55	no_virus	2.9039	FALSE	FALSE	FALSE	FALSE	FALSE	FALSE
RR057e_00860	SEQ014	M	53	no_virus	0.636235	FALSE	FALSE	FALSE	FALSE	FALSE	FALSE
RR057e_00861	SEQ014	F	42	no_virus	0.327071	FALSE	FALSE	FALSE	FALSE	FALSE	FALSE
RR057e_00862	SEQ014	F	51	no_virus	3.23558	FALSE	FALSE	FALSE	FALSE	FALSE	FALSE
RR057e_00863	SEQ014	M	86	no_virus	1.40837	FALSE	FALSE	FALSE	FALSE	FALSE	FALSE
RR057e_00864	SEQ014	F	54	no_virus	0.458942	FALSE	FALSE	FALSE	FALSE	FALSE	FALSE
RR057e_00865	SEQ014	F	69	no_virus	0.0369728	FALSE	FALSE	FALSE	FALSE	FALSE	FALSE
RR057e_00866	SEQ014	F	82	no_virus	0.463035	FALSE	FALSE	FALSE	FALSE	FALSE	FALSE
RR057e_00867	SEQ014	F	80	no_virus	3.01224	FALSE	FALSE	FALSE	FALSE	FALSE	FALSE
RR057e_00868	SEQ014	F	36	no_virus	0.341882	FALSE	FALSE	FALSE	FALSE	FALSE	FALSE
RR057e_00869	SEQ014	F	44	no_virus	0.440751	FALSE	FALSE	FALSE	FALSE	FALSE	FALSE
RR057e_00870	SEQ014	F	55	no_virus	0.26952	FALSE	FALSE	FALSE	FALSE	FALSE	FALSE
RR057e_00872	SEQ014	F	45	no_virus	0.568345	FALSE	FALSE	FALSE	FALSE	FALSE	FALSE
RR057e_00873	SEQ014	F	53	no_virus	2.30792	FALSE	FALSE	FALSE	FALSE	FALSE	FALSE
RR057e_00874	SEQ014	F	47	no_virus	0.527183	FALSE	FALSE	FALSE	FALSE	FALSE	FALSE
RR057e_00875	SEQ014	F	44	no_virus	0.721826	FALSE	FALSE	FALSE	FALSE	FALSE	FALSE
RR057e_00876	SEQ014	F	47	no_virus	1.53616	FALSE	FALSE	FALSE	FALSE	FALSE	FALSE
RR057e_00877	SEQ014	M	58	no_virus	0.34538	FALSE	FALSE	FALSE	FALSE	FALSE	FALSE
RR057e_00878	SEQ014	M	66	no_virus	0.419685	FALSE	FALSE	FALSE	FALSE	FALSE	FALSE
RR057e_00880	SEQ014	F	25	no_virus	0.600327	FALSE	FALSE	FALSE	FALSE	FALSE	FALSE
RR057e_00881	SEQ014	F	60	no_virus	1.45567	FALSE	FALSE	FALSE	FALSE	FALSE	FALSE
RR057e_00882	SEQ014	F	24	no_virus	0.5562	FALSE	FALSE	FALSE	FALSE	FALSE	FALSE
RR057e_00883	SEQ014	F	46	no_virus	0.248678	FALSE	FALSE	FALSE	FALSE	FALSE	FALSE
RR057e_00884	SEQ014	F	44	no_virus	0.582027	FALSE	FALSE	FALSE	FALSE	FALSE	FALSE
RR057e_00885	SEQ014	F	45	no_virus	1.30829	FALSE	FALSE	FALSE	FALSE	FALSE	FALSE
RR057e_00887	SEQ014	M	43	no_virus	0.956037	FALSE	FALSE	FALSE	FALSE	FALSE	FALSE
RR057i_00075	SEQ003	M	50	no_virus	64.3242	FALSE	FALSE	FALSE	FALSE	FALSE	FALSE
RR057i_00083	SEQ003	F	63	no_virus	0.117495	FALSE	FALSE	FALSE	FALSE	FALSE	FALSE
RR057i_00115	SEQ003	M	53	no_virus	0.0868524	FALSE	FALSE	FALSE	FALSE	FALSE	FALSE
RR057i_00116	SEQ003	F	54	no_virus	0.0558719	FALSE	FALSE	FALSE	FALSE	FALSE	FALSE
RR057i_00117	SEQ003	F	52	no_virus	0.124482	FALSE	FALSE	FALSE	FALSE	FALSE	FALSE
RR057i_00118	SEQ003	M	53	no_virus	0.0559219	FALSE	FALSE	FALSE	FALSE	FALSE	FALSE
RR057i_00119	SEQ003	F	46	no_virus	0.163641	FALSE	FALSE	FALSE	FALSE	FALSE	FALSE
RR057i_00120	SEQ003	M	NA	no_virus	0.0903693	FALSE	FALSE	FALSE	FALSE	FALSE	FALSE
RR057i_00173	SEQ003	F	52	no_virus	0.159362	FALSE	FALSE	FALSE	FALSE	FALSE	FALSE
RR057i_00175	SEQ003	F	69	no_virus	0.133317	FALSE	FALSE	FALSE	FALSE	FALSE	FALSE
RR057i_00176	SEQ003	F	20	no_virus	0.101605	FALSE	FALSE	FALSE	FALSE	FALSE	FALSE
RR057i_00177	SEQ003	M	38	no_virus	0	FALSE	FALSE	FALSE	FALSE	FALSE	FALSE
RR057i_00179	SEQ003	M	27	no_virus	0	FALSE	FALSE	FALSE	FALSE	FALSE	FALSE
RR057i_00180	SEQ003	F	33	no_virus	0.0905117	FALSE	FALSE	FALSE	FALSE	FALSE	FALSE
RR057e_00037	SEQ003	F	67	other_virus	0.324217	FALSE	FALSE	TRUE	FALSE	FALSE	FALSE
RR057e_00047	SEQ005	M	45	other_virus	0.223693	FALSE	FALSE	FALSE	FALSE	FALSE	TRUE
RR057e_00060	SEQ005	M	73	other_virus	0.268898	FALSE	FALSE	FALSE	FALSE	FALSE	TRUE
RR057e_00070	SEQ014	M	19	other_virus	0.904868	TRUE	FALSE	FALSE	FALSE	FALSE	FALSE
RR057e_00107	SEQ003	M	40	other_virus	0.0340948	FALSE	TRUE	FALSE	FALSE	FALSE	FALSE
RR057e_00133	SEQ005	F	34	other_virus	0.930972	FALSE	TRUE	FALSE	FALSE	FALSE	FALSE
RR057e_00134	SEQ005	F	32	other_virus	0.260368	FALSE	FALSE	TRUE	FALSE	FALSE	FALSE
RR057e_00137	SEQ003	F	38	other_virus	0	FALSE	FALSE	FALSE	FALSE	TRUE	FALSE
RR057e_00148	SEQ005	F	21	other_virus	0.39396	FALSE	TRUE	FALSE	FALSE	FALSE	FALSE
RR057e_00161	SEQ005	F	30	other_virus	0.285714	TRUE	FALSE	FALSE	FALSE	FALSE	FALSE
RR057e_00184	SEQ003	M	61	other_virus	0.0965482	TRUE	FALSE	FALSE	FALSE	FALSE	FALSE
RR057e_00200	SEQ003	M	25	other_virus	0.139986	TRUE	FALSE	FALSE	FALSE	FALSE	FALSE
RR057e_00223	SEQ003	M	62	other_virus	0.053333	FALSE	TRUE	FALSE	FALSE	FALSE	FALSE
RR057e_00224	SEQ005	F	46	other_virus	0.298705	TRUE	FALSE	FALSE	FALSE	FALSE	FALSE
RR057e_00232	SEQ005	F	47	other_virus	0.386192	TRUE	FALSE	FALSE	FALSE	FALSE	FALSE
RR057e_00237	SEQ005	F	33	other_virus	0.282704	FALSE	TRUE	FALSE	FALSE	FALSE	FALSE
RR057e_00250	SEQ005	M	71	other_virus	0.461645	TRUE	FALSE	FALSE	FALSE	FALSE	FALSE
RR057e_00253	SEQ003	M	51	other_virus	0.0399346	TRUE	FALSE	FALSE	FALSE	FALSE	FALSE
RR057e_00296	SEQ005	F	35	other_virus	1.12412	FALSE	TRUE	FALSE	FALSE	FALSE	FALSE
RR057e_00403	SEQ003	F	34	other_virus	0.0551387	FALSE	TRUE	FALSE	FALSE	FALSE	FALSE
RR057e_00418	SEQ005	F	34	other_virus	0.331543	TRUE	FALSE	FALSE	FALSE	FALSE	FALSE
RR057e_00423	SEQ003	M	86	other_virus	0.040523	FALSE	FALSE	FALSE	TRUE	FALSE	FALSE
RR057e_00427	SEQ003	F	67	other_virus	0.0475652	FALSE	FALSE	TRUE	FALSE	FALSE	FALSE
RR057e_00431	SEQ005	M	48	other_virus	0.386349	TRUE	FALSE	FALSE	FALSE	FALSE	FALSE
RR057e_00436	SEQ003	M	69	other_virus	0.159686	FALSE	FALSE	FALSE	FALSE	FALSE	TRUE
RR057e_00437	SEQ003	M	69	other_virus	0.114698	FALSE	FALSE	FALSE	FALSE	FALSE	TRUE
RR057e_00454	SEQ003	M	82	other_virus	0.778125	FALSE	FALSE	TRUE	FALSE	FALSE	FALSE
RR057e_00488	SEQ005	M	29	other_virus	0.465733	FALSE	TRUE	FALSE	FALSE	FALSE	FALSE
RR057e_00489	SEQ005	M	40	other_virus	0.501292	TRUE	FALSE	FALSE	FALSE	FALSE	FALSE
RR057e_00491	SEQ005	M	75	other_virus	0.645565	FALSE	FALSE	FALSE	FALSE	FALSE	TRUE
RR057e_00504	SEQ005	M	25	other_virus	0.171359	FALSE	TRUE	FALSE	FALSE	FALSE	FALSE
RR057e_00505	SEQ005	M	89	other_virus	0.24994	TRUE	FALSE	FALSE	TRUE	FALSE	FALSE
RR057e_00512	SEQ005	M	35	other_virus	0.211939	FALSE	TRUE	FALSE	FALSE	FALSE	FALSE
RR057e_00516	SEQ005	M	55	other_virus	0.273249	FALSE	FALSE	FALSE	FALSE	FALSE	TRUE
RR057e_00520	SEQ005	F	79	other_virus	0.394572	FALSE	FALSE	TRUE	FALSE	FALSE	FALSE
RR057e_00534	SEQ005	F	57	other_virus	0.982516	FALSE	FALSE	TRUE	FALSE	FALSE	FALSE
RR057e_00540	SEQ005	F	42	other_virus	1.57614	FALSE	TRUE	FALSE	FALSE	FALSE	FALSE
RR057e_00577	SEQ005	F	42	other_virus	0.325661	TRUE	FALSE	FALSE	FALSE	FALSE	FALSE
RR057e_00581	SEQ005	F	40	other_virus	0.235305	FALSE	FALSE	FALSE	FALSE	FALSE	TRUE
RR057e_00586	SEQ005	M	85	other_virus	1.00763	TRUE	FALSE	FALSE	TRUE	FALSE	FALSE
RR057e_00761	SEQ003	M	44	other_virus	0.150602	TRUE	FALSE	FALSE	FALSE	FALSE	FALSE
RR057e_00764	SEQ003	F	71	other_virus	0.0761018	TRUE	FALSE	FALSE	FALSE	FALSE	FALSE
RR057e_00799	SEQ014	M	67	other_virus	0.552016	TRUE	FALSE	FALSE	FALSE	FALSE	FALSE
RR057e_00800	SEQ014	M	22	other_virus	0.582841	FALSE	TRUE	FALSE	FALSE	FALSE	FALSE
RR057e_00801	SEQ014	F	74	other_virus	0.343582	TRUE	FALSE	FALSE	FALSE	FALSE	FALSE
RR057e_00802	SEQ014	F	52	other_virus	0.199041	TRUE	FALSE	FALSE	FALSE	FALSE	FALSE
RR057e_00803	SEQ014	M	42	other_virus	0.92981	TRUE	FALSE	FALSE	FALSE	FALSE	FALSE
RR057e_00804	SEQ014	F	36	other_virus	0.906263	TRUE	FALSE	FALSE	FALSE	FALSE	FALSE
RR057e_00807	SEQ014	F	77	other_virus	0.366596	TRUE	FALSE	FALSE	FALSE	FALSE	FALSE
RR057e_00809	SEQ014	M	39	other_virus	0.239978	TRUE	FALSE	FALSE	FALSE	FALSE	TRUE
RR057e_00810	SEQ014	F	41	other_virus	2.5022	FALSE	TRUE	FALSE	FALSE	FALSE	FALSE
RR057e_00811	SEQ014	M	75	other_virus	0.266336	FALSE	FALSE	FALSE	TRUE	FALSE	FALSE
RR057e_00817	SEQ014	F	75	other_virus	0.183079	FALSE	FALSE	TRUE	FALSE	FALSE	FALSE
RR057e_00824	SEQ014	M	44	other_virus	0.750746	TRUE	FALSE	FALSE	FALSE	FALSE	FALSE
RR057e_00850	SEQ014	F	45	other_virus	1.50757	FALSE	FALSE	FALSE	TRUE	FALSE	FALSE
RR057e_00859	SEQ014	F	46	other_virus	0.469079	TRUE	FALSE	FALSE	FALSE	FALSE	FALSE
RR057e_00871	SEQ014	F	35	other_virus	0.330902	TRUE	FALSE	FALSE	FALSE	FALSE	FALSE
RR057e_00879	SEQ014	F	32	other_virus	0.981687	TRUE	FALSE	FALSE	FALSE	FALSE	FALSE
RR057e_00886	SEQ014	M	31	other_virus	2.18394	TRUE	FALSE	FALSE	FALSE	FALSE	FALSE
RR057e_00719	SEQ003	M	40	SC2	265.473	FALSE	FALSE	FALSE	FALSE	FALSE	FALSE
RR057e_00721	SEQ003	M	27	SC2	538092	FALSE	FALSE	FALSE	FALSE	FALSE	FALSE
RR057e_00726	SEQ003	M	74	SC2	1056.45	FALSE	FALSE	FALSE	FALSE	FALSE	FALSE
RR057e_00727	SEQ003	F	55	SC2	100600	FALSE	FALSE	FALSE	FALSE	FALSE	FALSE
RR057e_00728	SEQ003	F	40	SC2	496.589	FALSE	FALSE	FALSE	FALSE	FALSE	FALSE
RR057e_00729	SEQ003	F	35	SC2	61.4267	FALSE	FALSE	FALSE	FALSE	FALSE	FALSE
RR057e_00731	SEQ003	F	63	SC2	90961.2	FALSE	FALSE	FALSE	FALSE	FALSE	FALSE
RR057e_00735	SEQ003	M	20	SC2	553.735	FALSE	FALSE	FALSE	FALSE	FALSE	FALSE
RR057e_00736	SEQ003	F	51	SC2	31.4009	FALSE	FALSE	FALSE	FALSE	FALSE	FALSE
RR057e_00737	SEQ003	F	35	SC2	134284	FALSE	FALSE	FALSE	FALSE	FALSE	FALSE
RR057e_00741	SEQ003	F	38	SC2	2921.39	FALSE	FALSE	FALSE	FALSE	FALSE	FALSE
RR057e_00746	SEQ003	M	82	SC2	97092.3	FALSE	FALSE	FALSE	FALSE	FALSE	FALSE
RR057e_00747	SEQ003	F	32	SC2	31.2766	FALSE	FALSE	FALSE	FALSE	FALSE	FALSE
RR057e_00748	SEQ003	M	28	SC2	127.559	FALSE	FALSE	FALSE	FALSE	FALSE	FALSE
RR057e_00749	SEQ003	M	55	SC2	85.9637	FALSE	FALSE	FALSE	FALSE	FALSE	FALSE
RR057e_00750	SEQ003	F	67	SC2	742001	FALSE	FALSE	FALSE	FALSE	FALSE	FALSE
RR057e_00751	SEQ005	F	58	SC2	96314.8	FALSE	FALSE	FALSE	FALSE	FALSE	FALSE
RR057e_00752	SEQ005	M	41	SC2	227.365	FALSE	FALSE	FALSE	FALSE	FALSE	FALSE
RR057e_00753	SEQ005	F	36	SC2	350.242	FALSE	FALSE	FALSE	FALSE	FALSE	FALSE
RR057e_00754	SEQ005	M	68	SC2	497051	FALSE	FALSE	FALSE	FALSE	FALSE	FALSE
RR057e_00756	SEQ005	F	34	SC2	2465.12	FALSE	FALSE	FALSE	FALSE	FALSE	FALSE
RR057e_00757	SEQ005	F	64	SC2	289.401	FALSE	FALSE	FALSE	FALSE	FALSE	FALSE
RR057e_00759	SEQ005	M	46	SC2	69.2188	FALSE	FALSE	FALSE	FALSE	FALSE	FALSE
RR057e_00768	SEQ007	F	72	SC2	58171.9	FALSE	FALSE	FALSE	FALSE	FALSE	FALSE
RR057e_00773	SEQ007	M	43	SC2	351.863	FALSE	FALSE	FALSE	FALSE	FALSE	FALSE
RR057e_00775	SEQ007	F	34	SC2	77488.5	FALSE	FALSE	FALSE	FALSE	FALSE	FALSE
RR057e_00776	SEQ007	M	64	SC2	12642.1	FALSE	FALSE	FALSE	FALSE	FALSE	FALSE
RR057e_00779	SEQ007	M	31	SC2	133.185	FALSE	FALSE	FALSE	FALSE	FALSE	FALSE
RR057e_00782	SEQ007	F	55	SC2	34572.1	FALSE	FALSE	FALSE	FALSE	FALSE	FALSE
RR057e_00783	SEQ007	M	28	SC2	602.369	FALSE	FALSE	FALSE	FALSE	FALSE	FALSE
RR057e_00797	SEQ007	F	26	SC2	75692.3	FALSE	FALSE	FALSE	FALSE	FALSE	FALSE
RR057e_00943	SEQ014	M	NA	SC2	1779.87	FALSE	FALSE	FALSE	FALSE	FALSE	FALSE
RR057e_00947	SEQ014	M	NA	SC2	68.9411	FALSE	FALSE	FALSE	FALSE	FALSE	FALSE
RR057e_00949	SEQ014	M	NA	SC2	43037.6	FALSE	FALSE	FALSE	FALSE	FALSE	FALSE
RR057e_00953	SEQ014	M	NA	SC2	76.1732	FALSE	FALSE	FALSE	FALSE	FALSE	FALSE
RR057i_00062	SEQ003	M	43	SC2	92.2579	FALSE	FALSE	FALSE	FALSE	FALSE	FALSE
RR057i_00067	SEQ003	F	44	SC2	1625.17	FALSE	FALSE	FALSE	FALSE	FALSE	FALSE
RR057i_00068	SEQ003	F	62	SC2	42.4041	FALSE	FALSE	FALSE	FALSE	FALSE	FALSE
RR057i_00069	SEQ003	M	35	SC2	12253.5	FALSE	FALSE	FALSE	FALSE	FALSE	FALSE
RR057i_00070	SEQ003	F	44	SC2	25.388	FALSE	FALSE	FALSE	FALSE	FALSE	FALSE
RR057i_00071	SEQ003	F	57	SC2	300518	FALSE	FALSE	FALSE	FALSE	FALSE	FALSE
RR057i_00072	SEQ003	F	33	SC2	64023.4	FALSE	FALSE	FALSE	FALSE	FALSE	FALSE
RR057i_00074	SEQ003	M	62	SC2	41668.6	FALSE	FALSE	FALSE	FALSE	FALSE	FALSE
RR057i_00076	SEQ003	F	26	SC2	557.083	FALSE	FALSE	FALSE	FALSE	FALSE	FALSE
RR057i_00077	SEQ003	M	29	SC2	608782	FALSE	FALSE	FALSE	FALSE	FALSE	FALSE
RR057i_00078	SEQ003	M	34	SC2	16819.9	FALSE	FALSE	FALSE	FALSE	FALSE	FALSE
RR057i_00080	SEQ003	M	24	SC2	5636.57	FALSE	FALSE	FALSE	FALSE	FALSE	FALSE
RR057i_00081	SEQ003	F	47	SC2	54.9919	FALSE	FALSE	FALSE	FALSE	FALSE	FALSE
RR057i_00082	SEQ003	F	63	SC2	7482.64	FALSE	FALSE	FALSE	FALSE	FALSE	FALSE
RR057i_00084	SEQ003	F	42	SC2	89327.2	FALSE	FALSE	FALSE	FALSE	FALSE	FALSE
RR057i_00086	SEQ003	F	27	SC2	6790.12	FALSE	FALSE	FALSE	FALSE	FALSE	FALSE
RR057i_00088	SEQ003	F	20	SC2	5328.73	FALSE	FALSE	FALSE	FALSE	FALSE	FALSE
RR057i_00089	SEQ003	M	29	SC2	445.095	FALSE	FALSE	FALSE	FALSE	FALSE	FALSE
RR057i_00090	SEQ003	F	76	SC2	964.821	FALSE	FALSE	FALSE	FALSE	FALSE	FALSE
RR057i_00095	SEQ003	M	NA	SC2	43351.3	FALSE	FALSE	FALSE	FALSE	FALSE	FALSE
RR057i_00096	SEQ003	F	NA	SC2	768.216	FALSE	FALSE	FALSE	FALSE	FALSE	FALSE
RR057i_00098	SEQ003	F	NA	SC2	59034.8	FALSE	FALSE	FALSE	FALSE	FALSE	FALSE
RR057i_00099	SEQ003	M	NA	SC2	156.264	FALSE	FALSE	FALSE	FALSE	FALSE	FALSE
RR057i_00100	SEQ003	F	NA	SC2	150956	FALSE	FALSE	FALSE	FALSE	FALSE	FALSE
RR057i_00101	SEQ003	M	NA	SC2	331.514	FALSE	FALSE	FALSE	FALSE	FALSE	FALSE
RR057i_00103	SEQ003	M	NA	SC2	45313.9	FALSE	FALSE	FALSE	FALSE	FALSE	FALSE
RR057i_00104	SEQ003	M	NA	SC2	106899	FALSE	FALSE	FALSE	FALSE	FALSE	FALSE
RR057i_00106	SEQ003	M	NA	SC2	46.4766	FALSE	FALSE	FALSE	FALSE	FALSE	FALSE
RR057i_00108	SEQ003	M	53	SC2	16194.5	FALSE	FALSE	FALSE	FALSE	FALSE	FALSE
RR057i_00109	SEQ003	M	41	SC2	194.375	FALSE	FALSE	FALSE	FALSE	FALSE	FALSE
RR057i_00110	SEQ003	F	62	SC2	298.498	FALSE	FALSE	FALSE	FALSE	FALSE	FALSE
RR057i_00112	SEQ003	F	43	SC2	227.342	FALSE	FALSE	FALSE	FALSE	FALSE	FALSE
RR057i_00114	SEQ003	M	62	SC2	371.589	FALSE	FALSE	FALSE	FALSE	FALSE	FALSE
RR057i_00122	SEQ003	M	64	SC2	20804.1	FALSE	FALSE	FALSE	FALSE	FALSE	FALSE
RR057i_00133	SEQ003	F	69	SC2	407387	FALSE	FALSE	FALSE	FALSE	FALSE	FALSE
RR057i_00134	SEQ003	M	40	SC2	32.277	FALSE	FALSE	FALSE	FALSE	FALSE	FALSE
RR057i_00136	SEQ003	M	44	SC2	146428	FALSE	FALSE	FALSE	FALSE	FALSE	FALSE
RR057i_00137	SEQ003	F	55	SC2	20148.9	FALSE	FALSE	FALSE	FALSE	FALSE	FALSE
RR057i_00138	SEQ003	F	71	SC2	710719	FALSE	FALSE	FALSE	FALSE	FALSE	FALSE
RR057i_00139	SEQ003	M	64	SC2	7758.49	FALSE	FALSE	FALSE	FALSE	FALSE	FALSE
RR057i_00141	SEQ003	M	46	SC2	352.673	FALSE	FALSE	FALSE	FALSE	FALSE	FALSE
RR057i_00145	SEQ003	M	21	SC2	16066.3	FALSE	FALSE	FALSE	FALSE	FALSE	FALSE
RR057i_00147	SEQ003	F	26	SC2	33661.7	FALSE	FALSE	FALSE	FALSE	FALSE	FALSE
RR057i_00151	SEQ003	F	34	SC2	462.238	FALSE	FALSE	FALSE	FALSE	FALSE	FALSE
RR057i_00154	SEQ003	F	45	SC2	914.367	FALSE	FALSE	FALSE	FALSE	FALSE	FALSE
RR057i_00156	SEQ003	M	31	SC2	1598.9	FALSE	FALSE	FALSE	FALSE	FALSE	FALSE
RR057i_00157	SEQ003	F	76	SC2	770097	FALSE	FALSE	FALSE	FALSE	FALSE	FALSE
RR057i_00158	SEQ003	F	54	SC2	1484.99	FALSE	FALSE	FALSE	FALSE	FALSE	FALSE
RR057i_00167	SEQ003	M	71	SC2	270.109	FALSE	FALSE	FALSE	FALSE	FALSE	FALSE
RR057i_00171	SEQ003	F	63	SC2	37.5968	FALSE	FALSE	FALSE	FALSE	FALSE	FALSE
RR057i_00187	SEQ006	F	70	SC2	4077.07	FALSE	FALSE	FALSE	FALSE	FALSE	FALSE
RR057i_00188	SEQ014	F	NA	SC2	194794	FALSE	FALSE	FALSE	FALSE	FALSE	FALSE
RR057i_00189	SEQ014	M	NA	SC2	158.054	FALSE	FALSE	FALSE	FALSE	FALSE	FALSE
RR057i_00190	SEQ014	M	NA	SC2	6645.12	FALSE	FALSE	FALSE	FALSE	FALSE	FALSE
RR057i_00204	SEQ014	F	38	SC2	2540.01	FALSE	FALSE	FALSE	FALSE	FALSE	FALSE

## Sheet: NewYork_samples_metadata
SampleID	Class
COVSUBJ_0001_1_P_HA	Positive
COVSUBJ_0002_1_N_HA	OtherViralInfection
COVSUBJ_0003_1_P_HA	Positive
COVSUBJ_0006_1_N_HA	Negative
COVSUBJ_0007_1_N_HA	Negative
COVSUBJ_0008_1_N_HA	Negative
COVSUBJ_0009_2_P_HA	Positive
COVSUBJ_0010_1_N_HA	Negative
COVSUBJ_0011_1_N_HA	Negative
COVSUBJ_0012_1_N_HA	Negative
COVSUBJ_0013_1_N_HA	Negative
COVSUBJ_0014_1_P_HA	Positive
COVSUBJ_0016_1_P_HA	Positive
COVSUBJ_0017_1_P_HA	Positive
COVSUBJ_0018_1_P_HA	Positive
COVSUBJ_0019_1_N_HA	Negative
COVSUBJ_0020_1_N_HA	Negative
COVSUBJ_0021_1_N_HA	Negative
COVSUBJ_0022_1_N_HA	Negative
COVSUBJ_0023_1_P_HA	Positive
COVSUBJ_0024_1_P_HA	Positive
COVSUBJ_0025_1_N_HA	Negative
COVSUBJ_0026_1_P_HA	Positive
COVSUBJ_0027_1_N_HA	Negative
COVSUBJ_0028_1_N_HA	OtherViralInfection
COVSUBJ_0029_1_N_HA	Negative
COVSUBJ_0030_1_N_HA	Negative
COVSUBJ_0031_1_N_HA	Negative
COVSUBJ_0032_1_P_HA	Positive
COVSUBJ_0033_1_N_HA	Negative
COVSUBJ_0034_1_P_HA	Positive
COVSUBJ_0036_1_N_HA	Negative
COVSUBJ_0037_1_P_HA	Positive
COVSUBJ_0038_1_P_HA	Positive
COVSUBJ_0039_1_N_HA	Negative
COVSUBJ_0040_1_N_HA	Negative
COVSUBJ_0041_1_N_HA	Negative
COVSUBJ_0042_1_N_HA	Negative
COVSUBJ_0043_1_P_HA	Positive
COVSUBJ_0045_1_P_HA	Positive
COVSUBJ_0047_1_N_HA	OtherViralInfection
COVSUBJ_0048_1_N_HA	OtherViralInfection
COVSUBJ_0049_1_P_HA	Positive
COVSUBJ_0050_1_N_HA	Negative
COVSUBJ_0051_1_N_HA	Negative
COVSUBJ_0052_1_N_HA	OtherViralInfection
COVSUBJ_0053_1_N_HA	Negative
COVSUBJ_0054_1_N_HA	Negative
COVSUBJ_0055_1_N_HA	Negative
COVSUBJ_0056_1_N_HA	Negative
COVSUBJ_0057_1_N_HA	Negative
COVSUBJ_0058_1_N_HA	Negative
COVSUBJ_0059_1_N_HA	Negative
COVSUBJ_0060_1_N_HA	Negative
COVSUBJ_0061_1_N_HA	Negative
COVSUBJ_0062_1_P_HA	Positive
COVSUBJ_0063_1_P_HA	Positive
COVSUBJ_0064_1_N_HA	Negative
COVSUBJ_0065_1_N_HA	Negative
COVSUBJ_0066_1_P_HA	Positive
COVSUBJ_0067_1_P_HA	Positive
COVSUBJ_0068_1_P_HA	Positive
COVSUBJ_0069_1_P_HA	Positive
COVSUBJ_0070_1_P_HA	Positive
COVSUBJ_0071_1_N_HA	OtherViralInfection
COVSUBJ_0071_2_P_HA	Positive
COVSUBJ_0072_1_P_HA	Positive
COVSUBJ_0073_1_P_HA	Positive
COVSUBJ_0074_1_P_HA	Positive
COVSUBJ_0075_1_P_HA	Positive
COVSUBJ_0076_1_P_HA	Positive
COVSUBJ_0077_1_P_HA	Positive
COVSUBJ_0078_1_P_HA	Positive
COVSUBJ_0079_1_P_HA	Positive
COVSUBJ_0080_1_P_HA	Positive
COVSUBJ_0081_1_P_HA	Positive
COVSUBJ_0082_1_N_HA	OtherViralInfection
COVSUBJ_0084_1_N_HA	Negative
COVSUBJ_0084_2_N_HA	Negative
COVSUBJ_0085_1_P_HA	Positive
COVSUBJ_0085_2_P_HA	Positive
COVSUBJ_0086_1_N_HA	Negative
COVSUBJ_0086_2_N_HA	Negative
COVSUBJ_0087_1_P_HA	Positive
COVSUBJ_0087_2_P_HA	Positive
COVSUBJ_0088_2_N_HA	Negative
COVSUBJ_0089_2_N_HA	Negative
COVSUBJ_0090_1_N_HA	Negative
COVSUBJ_0091_2_P_HA	Positive
COVSUBJ_0093_2_N_HA	Negative
COVSUBJ_0094_1_N_HA	Negative
COVSUBJ_0095_1_N_HA	Negative
COVSUBJ_0095_2_N_HA	Negative
COVSUBJ_0096_1_N_HA	Negative
COVSUBJ_0097_2_N_HA	OtherViralInfection
COVSUBJ_0098_1_N_HA	Negative
COVSUBJ_0099_1_N_HA	Negative
COVSUBJ_0100_2_N_HA	Negative
COVSUBJ_0101_1_P_HA	Positive
COVSUBJ_0102_1_N_HA	OtherViralInfection
COVSUBJ_0103_1_N_HA	OtherViralInfection
COVSUBJ_0105_2_N_HA	Negative
COVSUBJ_0106_2_N_HA	Negative
COVSUBJ_0109_1_N_HA	Negative
COVSUBJ_0110_1_N_HA	Negative
COVSUBJ_0111_1_N_HA	Negative
COVSUBJ_0112_1_N_HA	Negative
COVSUBJ_0113_1_N_HA	OtherViralInfection
COVSUBJ_0114_1_N_HA	Negative
COVSUBJ_0115_1_P_HA	Positive
COVSUBJ_0115_2_P_HA	Positive
COVSUBJ_0119_1_P_HA	Positive
COVSUBJ_0120_1_N_HA	Negative
COVSUBJ_0123_1_P_HA	Positive
COVSUBJ_0124_1_N_HA	OtherViralInfection
COVSUBJ_0126_1_N_HA	Negative
COVSUBJ_0127_1_N_HA	Negative
COVSUBJ_0128_1_N_HA	Negative
COVSUBJ_0129_1_N_HA	OtherViralInfection
COVSUBJ_0132_1_N_HA	Negative
COVSUBJ_0133_1_N_HA	Negative
COVSUBJ_0134_1_N_HA	Negative
COVSUBJ_0136_1_N_HA	Negative
COVSUBJ_0138_1_N_HA	Negative
COVSUBJ_0139_1_N_HA	Negative
COVSUBJ_0140_1_N_HA	Negative
COVSUBJ_0141_1_N_HA	OtherViralInfection
COVSUBJ_0142_1_N_HA	Negative
COVSUBJ_0142_2_P_HA	Positive
COVSUBJ_0143_1_P_HA	Positive
COVSUBJ_0143_2_P_HA	Positive
COVSUBJ_0144_1_P_WC	Positive
COVSUBJ_0147_1_N_WC	Negative
COVSUBJ_0150_1_P_HA	Positive
COVSUBJ_0151_1_N_HA	Negative
COVSUBJ_0153_1_N_HA	Negative
COVSUBJ_0155_1_N_HA	Negative
COVSUBJ_0156_1_N_WC	OtherViralInfection
COVSUBJ_0159_1_N_HA	OtherViralInfection
COVSUBJ_0160_1_N_HA	Negative
COVSUBJ_0161_1_N_HA	Negative
COVSUBJ_0162_1_N_HA	Negative
COVSUBJ_0163_1_N_HA	Negative
COVSUBJ_0164_1_N_HA	Negative
COVSUBJ_0165_1_N_HA	Negative
COVSUBJ_0166_1_N_HA	Negative
COVSUBJ_0167_1_N_HA	OtherViralInfection
COVSUBJ_0168_1_N_HA	OtherViralInfection
COVSUBJ_0169_1_N_HA	Negative
COVSUBJ_0171_1_N_HA	Negative
COVSUBJ_0172_1_P_HA	Positive
COVSUBJ_0173_1_N_HA	OtherViralInfection
COVSUBJ_0174_1_N_HA	Negative
COVSUBJ_0175_1_P_HA	Positive
COVSUBJ_0177_1_N_HA	Negative
COVSUBJ_0178_1_P_HA	Positive
COVSUBJ_0179_1_N_HA	Negative
COVSUBJ_0180_1_N_HA	OtherViralInfection
COVSUBJ_0183_1_N_HA	Negative
COVSUBJ_0184_1_N_HA	Negative
COVSUBJ_0185_1_N_HA	OtherViralInfection
COVSUBJ_0186_1_N_HA	Negative
COVSUBJ_0187_1_N_HA	OtherViralInfection
COVSUBJ_0188_1_N_HA	Negative
COVSUBJ_0189_1_N_HA	Negative
COVSUBJ_0190_1_N_HA	Negative
COVSUBJ_0192_1_P_HA	Positive
COVSUBJ_0193_1_N_HA	Negative
COVSUBJ_0193_2_N_HA	Negative
COVSUBJ_0194_1_N_HA	OtherViralInfection
COVSUBJ_0196_1_N_HA	Negative
COVSUBJ_0197_1_N_HA	Negative
COVSUBJ_0198_1_N_HA	Negative
COVSUBJ_0199_1_N_HA	Negative
COVSUBJ_0201_1_N_HA	Negative
COVSUBJ_0203_1_N_HA	OtherViralInfection
COVSUBJ_0204_1_P_HA	Positive
COVSUBJ_0205_1_N_HA	Negative
COVSUBJ_0207_1_N_HA	Negative
COVSUBJ_0210_1_N_HA	Negative
COVSUBJ_0211_1_N_HA	Negative
COVSUBJ_0213_1_N_HA	Negative
COVSUBJ_0214_1_N_HA	Negative
COVSUBJ_0215_1_N_HA	Negative
COVSUBJ_0216_1_P_HA	Positive
COVSUBJ_0219_1_N_HA	Negative
COVSUBJ_0220_1_N_HA	Negative
COVSUBJ_0222_1_N_HA	Negative
COVSUBJ_0223_1_N_HA	OtherViralInfection
COVSUBJ_0224_1_N_HA	OtherViralInfection
COVSUBJ_0225_1_P_HA	Positive
COVSUBJ_0226_1_N_HA	Negative
COVSUBJ_0227_1_N_HA	OtherViralInfection
COVSUBJ_0228_1_P_HA	Positive
COVSUBJ_0229_1_N_HA	Negative
COVSUBJ_0230_1_N_HA	Negative
COVSUBJ_0231_1_N_HA	Negative
COVSUBJ_0232_1_P_HA	Positive
COVSUBJ_0233_1_N_HA	Negative
COVSUBJ_0234_1_N_HA	Negative
COVSUBJ_0235_1_N_HA	Negative
COVSUBJ_0236_1_N_HA	Negative
COVSUBJ_0237_1_N_HA	Negative
COVSUBJ_0238_1_N_HA	Negative
COVSUBJ_0239_1_N_HA	Negative
COVSUBJ_0240_1_N_HA	Negative
COVSUBJ_0241_1_N_HA	Negative
COVSUBJ_0242_1_N_HA	Negative
COVSUBJ_0243_1_N_HA	Negative
COVSUBJ_0245_1_N_HA	Negative
COVSUBJ_0246_1_N_HA	OtherViralInfection
COVSUBJ_0249_1_N_HA	Negative
COVSUBJ_0250_1_N_HA	Negative
COVSUBJ_0251_1_P_HA	Positive
COVSUBJ_0253_1_N_HA	Negative
COVSUBJ_0255_1_N_HA	Negative
COVSUBJ_0257_1_N_HA	Negative
COVSUBJ_0259_1_N_HA	Negative
COVSUBJ_0260_2_N_HA	Negative
COVSUBJ_0261_1_N_HA	Negative
COVSUBJ_0263_1_N_HA	Negative
COVSUBJ_0264_1_N_HA	OtherViralInfection
COVSUBJ_0266_1_N_HA	Negative
COVSUBJ_0267_1_N_HA	Negative
COVSUBJ_0267_2_N_HA	Negative
COVSUBJ_0268_1_P_HA	Positive
COVSUBJ_0269_1_N_HA	Negative
COVSUBJ_0270_2_N_HA	Negative
COVSUBJ_0271_1_N_HA	OtherViralInfection
COVSUBJ_0272_1_N_HA	Negative
COVSUBJ_0273_1_N_HA	OtherViralInfection
COVSUBJ_0275_1_P_HA	Positive
COVSUBJ_0276_1_N_HA	Negative
COVSUBJ_0277_1_N_HA	Negative
COVSUBJ_0278_1_N_HA	Negative
COVSUBJ_0279_1_N_HA	Negative
COVSUBJ_0281_1_N_HA	Negative
COVSUBJ_0282_1_P_HA	Positive
COVSUBJ_0285_1_N_HA	OtherViralInfection
COVSUBJ_0286_1_N_HA	Negative
COVSUBJ_0287_1_N_HA	Negative
COVSUBJ_0288_1_N_HA	OtherViralInfection
COVSUBJ_0289_1_N_HA	Negative
COVSUBJ_0290_1_N_HA	Negative
COVSUBJ_0291_1_N_HA	OtherViralInfection
COVSUBJ_0292_1_N_HA	Negative
COVSUBJ_0293_1_N_HA	Negative
COVSUBJ_0294_1_N_HA	Negative
COVSUBJ_0295_1_N_HA	OtherViralInfection
COVSUBJ_0296_1_P_HA	Positive
COVSUBJ_0297_1_P_HA	Positive
COVSUBJ_0298_1_N_HA	OtherViralInfection
COVSUBJ_0299_1_N_HA	OtherViralInfection
COVSUBJ_0300_1_N_HA	Negative
COVSUBJ_0301_1_P_HA	Positive
COVSUBJ_0302_1_N_HA	OtherViralInfection
COVSUBJ_0303_1_N_HA	OtherViralInfection
COVSUBJ_0304_1_N_HA	OtherViralInfection
COVSUBJ_0305_1_N_HA	OtherViralInfection
COVSUBJ_0305_2_N_HA	Negative
COVSUBJ_0306_1_P_HA	Positive
COVSUBJ_0307_1_N_HA	Negative
COVSUBJ_0308_1_N_HA	Negative
COVSUBJ_0309_1_N_HA	Negative
COVSUBJ_0310_1_N_HA	Negative
COVSUBJ_0311_1_N_HA	Negative
COVSUBJ_0312_1_N_HA	Negative
COVSUBJ_0313_1_N_HA	OtherViralInfection
COVSUBJ_0314_1_N_HA	Negative
COVSUBJ_0315_1_N_HA	Negative
COVSUBJ_0316_1_N_HA	Negative
COVSUBJ_0317_1_N_HA	OtherViralInfection
COVSUBJ_0319_1_P_HA	Positive
COVSUBJ_0319_2_P_HA	Positive
COVSUBJ_0320_1_N_HA	Negative
COVSUBJ_0322_1_P_HA	Positive
COVSUBJ_0323_1_N_HA	OtherViralInfection
COVSUBJ_0326_1_N_HA	OtherViralInfection
COVSUBJ_0328_1_N_HA	Negative
COVSUBJ_0329_1_P_HA	Positive
COVSUBJ_0330_1_N_HA	OtherViralInfection
COVSUBJ_0331_1_N_HA	Negative
COVSUBJ_0332_1_N_HA	OtherViralInfection
COVSUBJ_0333_1_N_HA	Negative
COVSUBJ_0334_1_N_HA	Negative
COVSUBJ_0336_1_N_HA	Negative
COVSUBJ_0338_1_N_HA	Negative
COVSUBJ_0339_1_P_HA	Positive
COVSUBJ_0340_1_P_HA	Positive
COVSUBJ_0341_1_N_HA	Negative
COVSUBJ_0343_1_P_HA	Positive
COVSUBJ_0345_1_N_HA	Negative
COVSUBJ_0346_1_P_HA	Positive
COVSUBJ_0348_1_N_HA	Negative
COVSUBJ_0351_1_P_HA	Positive
COVSUBJ_0352_1_P_HA	Positive
COVSUBJ_0354_1_P_HA	Positive
COVSUBJ_0355_1_P_HA	Positive
COVSUBJ_0356_1_N_HA	Negative
COVSUBJ_0357_1_N_HA	Negative
COVSUBJ_0358_1_P_HA	Positive
COVSUBJ_0359_1_P_HA	Positive
COVSUBJ_0360_1_P_HA	Positive
COVSUBJ_0361_1_N_HA	Negative
COVSUBJ_0362_1_N_HA	OtherViralInfection
COVSUBJ_0363_1_N_HA	Negative
COVSUBJ_0364_1_P_HA	Positive
COVSUBJ_0365_1_N_HA	Negative
COVSUBJ_0366_1_P_HA	Positive
COVSUBJ_0367_1_P_HA	Positive
COVSUBJ_0368_1_P_HA	Positive
COVSUBJ_0369_1_P_HA	Positive
COVSUBJ_0370_1_N_HA	Negative
COVSUBJ_0371_1_P_HA	Positive
COVSUBJ_0372_1_P_HA	Positive
COVSUBJ_0373_1_N_HA	Negative
COVSUBJ_0374_1_N_HA	OtherViralInfection
COVSUBJ_0375_1_N_HA	Negative
COVSUBJ_0377_1_N_HA	Negative
COVSUBJ_0378_1_N_HA	Negative
COVSUBJ_0379_1_N_HA	Negative
COVSUBJ_0380_1_N_HA	Negative
COVSUBJ_0381_1_N_HA	Negative
COVSUBJ_0382_1_N_HA	Negative
COVSUBJ_0382_2_N_HA	Negative
COVSUBJ_0384_1_P_HA	Positive
COVSUBJ_0385_1_P_HA	Positive
COVSUBJ_0387_1_N_HA	Negative
COVSUBJ_0388_1_N_HA	Negative
COVSUBJ_0389_1_N_HA	Negative
COVSUBJ_0390_1_N_HA	Negative
COVSUBJ_0391_1_N_HA	Negative
COVSUBJ_0392_1_N_HA	Negative
COVSUBJ_0393_1_N_HA	OtherViralInfection
COVSUBJ_0394_1_N_HA	Negative
COVSUBJ_0398_1_P_HA	Positive
COVSUBJ_0402_1_P_HA	Positive
COVSUBJ_0402_2_P_HA	Positive
COVSUBJ_0403_1_N_HA	Negative
COVSUBJ_0403_2_N_HA	Negative
COVSUBJ_0404_1_N_HA	Negative
COVSUBJ_0405_2_N_HA	Negative
COVSUBJ_0406_1_N_HA	Negative
COVSUBJ_0408_1_N_HA	OtherViralInfection
COVSUBJ_0409_1_N_HA	Negative
COVSUBJ_0410_1_N_HA	Negative
COVSUBJ_0411_1_N_HA	Negative
COVSUBJ_0412_1_N_HA	OtherViralInfection
COVSUBJ_0413_1_N_HA	Negative
COVSUBJ_0414_1_N_HA	OtherViralInfection
COVSUBJ_0416_1_P_HA	Positive
COVSUBJ_0418_1_N_HA	OtherViralInfection
COVSUBJ_0426_1_N_HA	OtherViralInfection
COVSUBJ_0428_1_P_HA	Positive
COVSUBJ_0429_1_N_HA	OtherViralInfection
COVSUBJ_0431_1_N_HA	OtherViralInfection
COVSUBJ_0432_1_N_HA	Negative
COVSUBJ_0433_1_P_HA	Positive
COVSUBJ_0434_1_N_HA	Negative
COVSUBJ_0435_1_N_HA	Negative
COVSUBJ_0437_1_N_HA	Negative
COVSUBJ_0438_1_P_HA	Positive
COVSUBJ_0439_1_N_HA	Negative
COVSUBJ_0440_1_N_HA	Negative
COVSUBJ_0441_1_N_HA	OtherViralInfection
COVSUBJ_0442_1_P_HA	Positive
COVSUBJ_0443_1_N_HA	OtherViralInfection
COVSUBJ_0444_1_N_HA	Negative
COVSUBJ_0445_1_N_HA	Negative
COVSUBJ_0446_1_N_HA	Negative
COVSUBJ_0447_1_N_HA	OtherViralInfection
COVSUBJ_0449_1_P_HA	Positive
COVSUBJ_0450_1_N_HA	Negative
COVSUBJ_0451_1_N_HA	OtherViralInfection
COVSUBJ_0452_1_P_HA	Positive
COVSUBJ_0453_1_N_HA	Negative
COVSUBJ_0455_1_N_HA	Negative
COVSUBJ_0456_1_N_HA	Negative
COVSUBJ_0458_1_N_HA	Negative
COVSUBJ_0459_1_N_HA	Negative
COVSUBJ_0462_1_N_HA	Negative
COVSUBJ_0466_1_N_HA	Negative
COVSUBJ_0467_1_N_HA	Negative
COVSUBJ_0468_1_N_HA	Negative
COVSUBJ_0469_1_N_HA	Negative
COVSUBJ_0469_2_N_HA	Negative
COVSUBJ_0470_1_N_HA	Negative
COVSUBJ_0474_1_N_HA	Negative
COVSUBJ_0475_1_N_HA	Negative
COVSUBJ_0476_1_N_HA	Negative
COVSUBJ_0477_1_N_HA	OtherViralInfection
COVSUBJ_0478_1_N_HA	OtherViralInfection
COVSUBJ_0480_1_N_HA	Negative
COVSUBJ_0481_1_P_HA	Positive
COVSUBJ_0482_1_N_HA	Negative
COVSUBJ_0483_1_N_HA	Negative
COVSUBJ_0484_1_N_HA	Negative
COVSUBJ_0486_1_N_HA	Negative
COVSUBJ_0487_1_N_HA	Negative
COVSUBJ_0488_1_N_HA	Negative
COVSUBJ_0491_1_N_HA	Negative
COVSUBJ_0492_1_N_HA	Negative
COVSUBJ_0493_1_N_HA	OtherViralInfection
COVSUBJ_0494_1_N_HA	Negative
COVSUBJ_0495_1_N_HA	Negative
COVSUBJ_0495_2_N_HA	Negative
COVSUBJ_0496_1_N_HA	Negative
COVSUBJ_0497_1_N_HA	Negative
COVSUBJ_0498_1_N_HA	Negative
COVSUBJ_0499_1_N_HA	Negative
COVSUBJ_0500_1_N_HA	Negative
COVSUBJ_0501_1_N_HA	Negative
COVSUBJ_0502_1_N_HA	OtherViralInfection
COVSUBJ_0503_1_N_HA	OtherViralInfection
COVSUBJ_0504_1_N_HA	OtherViralInfection
COVSUBJ_0505_1_N_HA	Negative
COVSUBJ_0507_1_N_HA	OtherViralInfection
COVSUBJ_0509_1_P_HA	Positive
COVSUBJ_0510_1_N_HA	Negative
COVSUBJ_0511_1_N_HA	Negative
COVSUBJ_0512_1_P_HA	Positive
COVSUBJ_0513_1_N_HA	Negative
COVSUBJ_0514_1_P_HA	Positive
COVSUBJ_0515_1_N_HA	Negative
COVSUBJ_0516_1_N_HA	Negative
COVSUBJ_0518_1_N_HA	OtherViralInfection
COVSUBJ_0519_1_P_HA	Positive
COVSUBJ_0520_1_N_HA	OtherViralInfection
COVSUBJ_0521_1_N_HA	OtherViralInfection
COVSUBJ_0522_1_P_HA	Positive
COVSUBJ_0523_1_N_HA	OtherViralInfection
COVSUBJ_0524_1_N_HA	Negative
COVSUBJ_0525_1_N_HA	Negative
COVSUBJ_0526_1_P_HA	Positive
COVSUBJ_0529_1_N_HA	Negative
COVSUBJ_0531_1_P_HA	Positive
COVSUBJ_0532_1_N_HA	Negative
COVSUBJ_0533_1_P_HA	Positive
COVSUBJ_0534_1_N_HA	OtherViralInfection
COVSUBJ_0535_1_N_HA	Negative
COVSUBJ_0535_2_N_HA	Negative
COVSUBJ_0537_1_N_HA	Negative
COVSUBJ_0541_1_N_HA	Negative
COVSUBJ_0542_1_P_HA	Positive
COVSUBJ_0543_1_N_HA	Negative
COVSUBJ_0544_1_N_HA	Negative
COVSUBJ_0545_1_N_HA	Negative
COVSUBJ_0546_1_N_HA	Negative
COVSUBJ_0547_1_N_HA	Negative
COVSUBJ_0548_1_N_HA	Negative
COVSUBJ_0549_1_N_HA	Negative
COVSUBJ_0550_1_N_HA	Negative
COVSUBJ_0551_1_N_HA	OtherViralInfection
COVSUBJ_0552_1_N_HA	Negative
COVSUBJ_0555_1_N_HA	OtherViralInfection
COVSUBJ_0557_2_N_HA	Negative
COVSUBJ_0562_1_N_HA	Negative
COVSUBJ_0563_1_P_HA	Positive
COVSUBJ_0564_1_N_HA	Negative
COVSUBJ_0566_1_N_HA	Negative
COVSUBJ_0567_1_N_HA	Negative
COVSUBJ_0569_1_N_HA	OtherViralInfection
COVSUBJ_0570_1_N_HA	Negative
COVSUBJ_0571_1_N_HA	Negative
COVSUBJ_0572_1_N_HA	Negative
COVSUBJ_0573_1_N_HA	Negative
COVSUBJ_0574_1_N_HA	Negative
COVSUBJ_0575_1_P_HA	Positive
COVSUBJ_0576_1_P_HA	Positive
COVSUBJ_0577_1_P_HA	Positive
COVSUBJ_0578_1_N_HA	Negative
COVSUBJ_0579_1_N_HA	Negative
COVSUBJ_0580_1_N_HA	Negative
COVSUBJ_0582_1_N_HA	Negative
COVSUBJ_0583_1_P_HA	Positive
COVSUBJ_0584_1_N_HA	OtherViralInfection
COVSUBJ_0585_1_P_HA	Positive
COVSUBJ_0589_1_N_HA	Negative
COVSUBJ_0591_1_P_HA	Positive
COVSUBJ_0592_1_P_HA	Positive
COVSUBJ_0593_1_N_HA	Negative
COVSUBJ_0594_1_N_HA	Negative
COVSUBJ_0598_1_P_HA	Positive
COVSUBJ_0601_1_N_HA	Negative
COVSUBJ_0601_2_N_HA	Negative
COVSUBJ_0602_1_P_HA	Positive
COVSUBJ_0603_1_P_HA	Positive
COVSUBJ_0603_2_P_HA	Positive
COVSUBJ_0605_1_P_HA	Positive
COVSUBJ_0606_1_P_HA	Positive
COVSUBJ_0607_1_N_HA	OtherViralInfection
COVSUBJ_0608_1_P_HA	Positive
COVSUBJ_0609_1_P_HA	Positive
COVSUBJ_0610_1_P_HA	Positive
COVSUBJ_0611_1_N_HA	Negative
COVSUBJ_0612_1_P_HA	Positive
COVSUBJ_0613_1_N_HA	Negative
COVSUBJ_0614_1_P_HA	Positive
COVSUBJ_0615_1_P_HA	Positive
COVSUBJ_0616_1_N_HA	Negative
COVSUBJ_0617_1_N_HA	Negative
COVSUBJ_0618_1_N_HA	Negative
COVSUBJ_0620_1_P_HA	Positive
COVSUBJ_0621_1_N_HA	OtherViralInfection
COVSUBJ_0622_1_P_HA	Positive
COVSUBJ_0623_1_N_HA	Negative
COVSUBJ_0624_1_N_HA	Negative
COVSUBJ_0625_1_P_HA	Positive
COVSUBJ_0626_1_P_HA	Positive
COVSUBJ_0627_1_P_HA	Positive
COVSUBJ_0628_1_P_HA	Positive
COVSUBJ_0629_1_N_HA	Negative
COVSUBJ_0630_1_N_HA	Negative
COVSUBJ_0631_1_P_HA	Positive
COVSUBJ_0632_1_P_HA	Positive
COVSUBJ_0633_1_N_HA	Negative
COVSUBJ_0634_1_P_HA	Positive
COVSUBJ_0635_1_P_HA	Positive
COVSUBJ_0636_1_N_HA	Negative
COVSUBJ_0637_1_P_HA	Positive
COVSUBJ_0638_1_P_HA	Positive
COVSUBJ_0639_2_P_HA	Positive
COVSUBJ_0640_1_N_HA	Negative
COVSUBJ_0641_1_P_HA	Positive
COVSUBJ_0642_1_P_HA	Positive
COVSUBJ_0643_1_P_HA	Positive
COVSUBJ_0644_1_P_HA	Positive
COVSUBJ_0645_1_P_HA	Positive
COVSUBJ_0646_1_P_HA	Positive
COVSUBJ_0647_1_N_HA	Negative
COVSUBJ_0648_1_N_HA	Negative
COVSUBJ_0649_1_P_HA	Positive
COVSUBJ_0649_2_P_HA	Positive
COVSUBJ_0650_1_P_HA	Positive
COVSUBJ_0651_1_P_HA	Positive
COVSUBJ_0652_1_P_HA	Positive
COVSUBJ_0653_1_P_HA	Positive
COVSUBJ_0653_2_P_HA	Positive
COVSUBJ_0654_1_N_HA	Negative
COVSUBJ_0654_2_N_HA	Negative
COVSUBJ_0655_1_N_HA	Negative
COVSUBJ_0656_1_P_HA	Positive
COVSUBJ_0657_1_N_HA	Negative
COVSUBJ_0658_1_P_HA	Positive
COVSUBJ_0659_1_N_HA	Negative
COVSUBJ_0660_1_P_HA	Positive
COVSUBJ_0662_1_P_HA	Positive
COVSUBJ_0663_1_P_HA	Positive
COVSUBJ_0664_1_P_HA	Positive
COVSUBJ_0665_1_P_HA	Positive
COVSUBJ_0666_1_N_HA	Negative
COVSUBJ_0667_1_P_HA	Positive
COVSUBJ_0668_1_P_HA	Positive
